# Supplementary material for: miRNA-based signatures in cerebrospinal fluid as potential diagnostic tools for early stage Parkinson’s disease
Source: PubMed Central journal article supplement (PMC5915128; doi:10.18632/oncotarget.24736), 2018-04-03
Supplement: oncotarget-09-17455-s001.pdf [file oncotarget-09-17455-s001.pdf]

# miRNA-based signatures in cerebrospinal fluid as potential diagnostic tools for early stage Parkinson's disease

## SUPPLEMENTARY MATERIALS

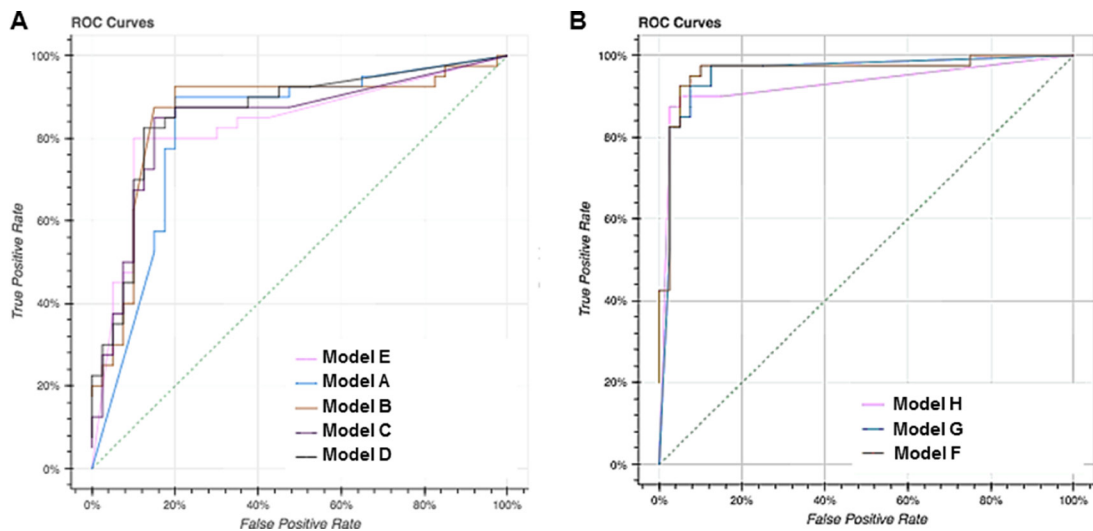

**Supplementary Figure 1: Diagnostic accuracy of potential models.** (A) ROC curve of miRNA-based models with high sensitivity and specificity values - selected Model A (blue line) and supplementary Models B (brown line), C (purple line), D (black line) and E (pink line). (B) ROC curves of selected miRNA+ $\alpha$ -syn Model F (brown line) and supplementary Models G (blue line) and H (pink line).

**Supplementary Table 1: Predictive values of miRNA-based models with sensitivity and specificity values above 80%**

| <b>Model</b> | <b>SEN</b> | <b>SPE</b> | <b>AUC</b> | <b>PPV</b> | <b>NPV</b> |
|--------------|------------|------------|------------|------------|------------|
| A            | 90.00%     | 80.00%     | 82.31%     | 81.82%     | 88.89%     |
| B            | 87.50%     | 85.00%     | 85.88%     | 85.37%     | 87.18%     |
| C            | 85.00%     | 85.00%     | 84.22%     | 85.00%     | 85.00%     |
| D            | 82.50%     | 87.50%     | 86.03%     | 86.84%     | 83.33%     |
| E            | 80.00%     | 90.00%     | 82.94%     | 88.89%     | 81.82%     |

Sensitivity (SEN), Specificity (SPE), Area under the curve (AUC), Positive predictive value (PPV) and Negative Predictive Value (NPV).

**Supplementary Table 2: Predictive values of models including miRNAs and  $\alpha$ -syn with sensitivity and specificity values above 90%**

| <b>Model</b> | <b>SEN</b> | <b>SPE</b> | <b>AUC</b> | <b>PPV</b> | <b>NPV</b> |
|--------------|------------|------------|------------|------------|------------|
| F            | 97.50%     | 90.00%     | 96.19%     | 90.70%     | 97.30%     |
| G            | 92.50%     | 92.50%     | 95.72%     | 92.50%     | 92.50%     |
| H            | 90.00%     | 95.00%     | 92.94%     | 94.74%     | 90.48%     |

Sensitivity (SEN), Specificity (SPE), Area under the curve (AUC), Positive predictive value (PPV) and Negative Predictive Value (NPV).
